# Supplementary material for: The RNA methyltransferase NSUN6 suppresses pancreatic cancer development by regulating cell proliferation
Source: PubMed Central journal article supplement — eBioMedicine. 2021 Jan 6;63:103195. doi: 10.1016/j.ebiom.2020.103195 (PMC7804980; doi:10.1016/j.ebiom.2020.103195), 2021-01-06
Supplement: mmc1.pdf [file mmc1.pdf]

## Supplementary Tables

**Supplementary Table 1. Clinical characteristics of 382 PC patients from 3 cohorts.**

| Characteristics                   | Verification samples (n = 382) |                    |                    |
|-----------------------------------|--------------------------------|--------------------|--------------------|
|                                   | Cohort 1 (n = 58)              | Cohort 2 (n = 100) | Cohort 3 (n = 224) |
| <b>Follow-up time (OS)</b>        |                                |                    |                    |
| Years, Median (ranges)            | N.A                            | 10.0 (0.0-87.0)    | 10.1 (0.1-77.0)    |
| <b>Age</b>                        |                                |                    |                    |
| Years, mean $\pm$ SD              | 64.8 $\pm$ 7.2                 | 61.7 $\pm$ 11.3    | 66.9 $\pm$ 9.9     |
| <60 years, n (%)                  | 18(31.0)                       | 47(47.0)           | 54(24.1)           |
| $\geq$ 60 years, n (%)            | 40(69.0)                       | 53(53.0)           | 170(75.9)          |
| <b>Gender</b>                     |                                |                    |                    |
| Female, n (%)                     | 24(41.4)                       | 37(37.0)           | 95(42.4)           |
| Male, n (%)                       | 34(58.6)                       | 63(63.0)           | 129(57.6)          |
| <b>Tumor location</b>             |                                |                    |                    |
| Head/neck, n (%)                  | 42(72.4)                       | 60(65.9)           | 153(68.3)          |
| Body/tail, n (%)                  | 16(27.6)                       | 31(34.1)           | 71(31.7)           |
| <b>Pathologic stage</b>           |                                |                    |                    |
| I-II, n (%)                       | 39(67.2)                       | 69(69.0)           | 140(62.5)          |
| III-IV, n (%)                     | 19(32.8)                       | 31(31.0)           | 84(37.5)           |
| <b>T classification</b>           |                                |                    |                    |
| T1-T2, n (%)                      | 45(77.6)                       | 78(79.6)           | 118(52.7)          |
| T3-T4, n (%)                      | 13(22.4)                       | 20(20.4)           | 106(47.3)          |
| <b>Lymph node metastasis</b>      |                                |                    |                    |
| No, n (%)                         | 32(55.2)                       | 54(58.1)           | 153(68.3)          |
| Yes, n (%)                        | 26(44.8)                       | 39(41.9)           | 71(31.7)           |
| <b>Distant metastasis</b>         |                                |                    |                    |
| No, n (%)                         | 56(96.6)                       | 98(98.0)           | 214(95.5)          |
| Yes, n (%)                        | 2(3.4)                         | 2(2.0)             | 10(4.5)            |
| <b>AJCC TNM stage</b>             |                                |                    |                    |
| I, n (%)                          | 23(39.7)                       | 40(42.1)           | 85(37.9)           |
| II-IV, n (%)                      | 35(60.3)                       | 55(57.9)           | 139(62.1)          |
| <b>Ki67<sup>+</sup> cell rate</b> |                                |                    |                    |
| $\leq$ 10%, n (%)                 | N.A                            | 64(64.0)           | 144(64.3)          |
| >10%, n (%)                       | N.A                            | 36(36.0)           | 80(35.7)           |
| <b>NSUN6 expression</b>           |                                |                    |                    |
| Low, n (%)                        | 28(50.0)                       | 48(48.0)           | 111(49.6)          |
| High, n (%)                       | 28(50.0)                       | 52(52.0)           | 113(50.4)          |

PC, pancreatic cancer; OS, overall survival; N.A, not applicable; SD, standard deviation.

**Supplementary Table 2. Correlation analysis between clinical characteristics and NSUN6 expression of PC in verification cohort 2.**

| Characteristics                   | NSUN6 expression (n = 100) |               | OR(95%CI)        | P value              |
|-----------------------------------|----------------------------|---------------|------------------|----------------------|
|                                   | Low (n = 48)               | High (n = 52) |                  |                      |
| <b>Age</b>                        |                            |               |                  |                      |
| <60 years, n (%)                  | 19(39.6)                   | 28(53.8)      | 1.78(0.80-3.94)  | 0.153                |
| ≥60 years, n (%)                  | 29(60.4)                   | 24(46.2)      |                  |                      |
| <b>Gender</b>                     |                            |               |                  |                      |
| Female, n (%)                     | 16(33.3)                   | 21(40.4)      | 1.35(0.60-3.07)  | 0.466                |
| Male, n (%)                       | 32(66.7)                   | 31(59.6)      |                  |                      |
| <b>Tumor location</b>             |                            |               |                  |                      |
| Head/neck, n (%)                  | 30(68.2)                   | 30(63.8)      | 0.82(0.35-1.97)  | 0.662                |
| Body/tail, n (%)                  | 14(31.8)                   | 17(36.2)      |                  |                      |
| <b>Pathologic stage</b>           |                            |               |                  |                      |
| I-II, n (%)                       | 32(66.7)                   | 37(71.2)      | 1.23(0.53-2.88)  | 0.628                |
| III-IV, n (%)                     | 16(33.3)                   | 15(28.8)      |                  |                      |
| <b>T classification</b>           |                            |               |                  |                      |
| T1-T2, n (%)                      | 32(69.6)                   | 46(88.5)      | 3.35(1.17-9.66)  | 0.021                |
| T3-T4, n (%)                      | 14(30.4)                   | 6(11.5)       |                  |                      |
| <b>Lymph node metastasis</b>      |                            |               |                  |                      |
| No, n (%)                         | 21(48.8)                   | 33(66.0)      | 2.03(0.88-4.69)  | 0.094                |
| Yes, n (%)                        | 22(51.2)                   | 17(34.0)      |                  |                      |
| <b>Distant metastasis</b>         |                            |               |                  |                      |
| No, n (%)                         | 46(95.8)                   | 52(100.0)     | /                | /                    |
| Yes, n (%)                        | 2(4.2)                     | 0(0.0)        |                  |                      |
| <b>AJCC TNM stage</b>             |                            |               |                  |                      |
| I, n (%)                          | 10(22.7)                   | 30(58.8)      | 4.86(1.98-11.93) | 3.8×10 <sup>-4</sup> |
| II-IV, n (%)                      | 34(77.3)                   | 21(41.2)      |                  |                      |
| <b>Ki67<sup>+</sup> cell rate</b> |                            |               |                  |                      |
| ≤10%, n (%)                       | 23(47.9)                   | 41(78.8)      | 4.05(1.69-9.71)  | 0.001                |
| >10%, n (%)                       | 25(52.1)                   | 11(21.2)      |                  |                      |

PC, pancreatic cancer; OR, odds ratio; CI, confidence interval.

**Supplementary Table 3. Correlation analysis between clinical characteristics and NSUN6 expression of PC in verification cohort 3.**

| Characteristics              | NSUN6 expression (n = 224) |                | OR(95%CI)       | P value              |
|------------------------------|----------------------------|----------------|-----------------|----------------------|
|                              | Low (n = 111)              | High (n = 113) |                 |                      |
| <b>Age</b>                   |                            |                |                 |                      |
| <60 years, n (%)             | 26(23.4)                   | 28(24.8)       | 1.08(0.58-1.99) | 0.813                |
| ≥60 years, n (%)             | 85(76.6)                   | 85(75.2)       |                 |                      |
| <b>Gender</b>                |                            |                |                 |                      |
| Female, n (%)                | 49(44.1)                   | 46(40.7)       | 0.87(0.51-1.48) | 0.603                |
| Male, n (%)                  | 62(55.9)                   | 67(59.3)       |                 |                      |
| <b>Tumor location</b>        |                            |                |                 |                      |
| Head/neck, n (%)             | 74(66.7)                   | 79(69.9)       | 1.16(0.66-2.04) | 0.602                |
| Body/tail, n (%)             | 37(33.3)                   | 34(30.1)       |                 |                      |
| <b>Pathologic stage</b>      |                            |                |                 |                      |
| I-II, n (%)                  | 65(58.6)                   | 75(66.4)       | 1.4(0.81-2.4)   | 0.227                |
| III-IV, n (%)                | 46(41.4)                   | 38(33.6)       |                 |                      |
| <b>T classification</b>      |                            |                |                 |                      |
| T1-T2, n (%)                 | 48(43.2)                   | 70(61.9)       | 2.14(1.25-3.64) | 0.005                |
| T3-T4, n (%)                 | 63(56.8)                   | 43(38.1)       |                 |                      |
| <b>Lymph node metastasis</b> |                            |                |                 |                      |
| No, n (%)                    | 76(68.5)                   | 77(68.1)       | 0.99(0.56-1.73) | 0.958                |
| Yes, n (%)                   | 35(31.5)                   | 36(31.9)       |                 |                      |
| <b>Distant metastasis</b>    |                            |                |                 |                      |
| No, n (%)                    | 105(94.6)                  | 109(96.5)      | 1.56(0.43-5.68) | 0.499                |
| Yes, n (%)                   | 6(5.4)                     | 4(3.5)         |                 |                      |
| <b>AJCC TNM stage</b>        |                            |                |                 |                      |
| I, n (%)                     | 33(29.7)                   | 52(46)         | 2.01(1.16-3.49) | 0.012                |
| II-IV, n (%)                 | 78(70.3)                   | 61(54)         |                 |                      |
| <b>Ki67+ cell rate</b>       |                            |                |                 |                      |
| ≤10%, n (%)                  | 59(53.2)                   | 85(75.2)       | 2.68(1.52-4.72) | 5.7×10 <sup>-4</sup> |
| >10%, n (%)                  | 52(46.8)                   | 28(24.8)       |                 |                      |

PC, pancreatic cancer; OR, odds ratio; CI, confidence interval.

**Supplementary Table 4. Correlation analysis between clinical characteristics and NSUN6 expression of PC in verification cohort 2 combined 3.**

| Characteristics                   | NSUN6 expression (n = 324) |                | OR(95%CI)       | P value              |
|-----------------------------------|----------------------------|----------------|-----------------|----------------------|
|                                   | Low (n = 159)              | High (n = 165) |                 |                      |
| <b>Age</b>                        |                            |                |                 |                      |
| <60 years, n (%)                  | 45(28.3)                   | 56(33.9)       | 1.3(0.81-2.09)  | 0.273                |
| ≥60 years, n (%)                  | 114(71.7)                  | 109(66.1)      |                 |                      |
| <b>Gender</b>                     |                            |                |                 |                      |
| Female, n (%)                     | 65(40.9)                   | 67(40.6)       | 0.99(0.63-1.54) | 0.960                |
| Male, n (%)                       | 94(59.1)                   | 98(59.4)       |                 |                      |
| <b>Tumor location</b>             |                            |                |                 |                      |
| Head/neck, n (%)                  | 104(67.1)                  | 109(68.1)      | 1.05(0.65-1.68) | 0.845                |
| Body/tail, n (%)                  | 51(32.9)                   | 51(31.9)       |                 |                      |
| <b>Pathologic stage</b>           |                            |                |                 |                      |
| I-II, n (%)                       | 97(61.0)                   | 112(67.9)      | 1.35(0.86-2.13) | 0.196                |
| III-IV, n (%)                     | 62(39.0)                   | 53(32.1)       |                 |                      |
| <b>T classification</b>           |                            |                |                 |                      |
| T1-T2, n (%)                      | 80(51.0)                   | 116(70.3)      | 2.28(1.44-3.6)  | 3.7×10 <sup>-4</sup> |
| T3-T4, n (%)                      | 77(49.0)                   | 49(29.7)       |                 |                      |
| <b>Lymph node metastasis</b>      |                            |                |                 |                      |
| No, n (%)                         | 97(63.0)                   | 110(67.5)      | 1.22(0.77-1.94) | 0.400                |
| Yes, n (%)                        | 57(37.0)                   | 53(32.5)       |                 |                      |
| <b>Distant metastasis</b>         |                            |                |                 |                      |
| No, n (%)                         | 151(95.0)                  | 161(97.6)      | 2.13(0.63-7.23) | 0.214                |
| Yes, n (%)                        | 8(5.0)                     | 4(2.4)         |                 |                      |
| <b>AJCC TNM stage</b>             |                            |                |                 |                      |
| I, n (%)                          | 43(27.7)                   | 82(50.0)       | 2.6(1.63-4.15)  | 4.7×10 <sup>-5</sup> |
| II-IV, n (%)                      | 112(72.3)                  | 82(50.0)       |                 |                      |
| <b>Ki67<sup>+</sup> cell rate</b> |                            |                |                 |                      |
| ≤10%, n (%)                       | 82(51.6)                   | 126(76.4)      | 3.03(1.89-4.88) | 3.3×10 <sup>-6</sup> |
| >10%, n (%)                       | 77(48.4)                   | 39(23.6)       |                 |                      |

PC, pancreatic cancer; OR, odds ratio; CI, confidence interval.

**Supplementary Table 5.** Sequence of shRNA and qPCR primers

| <b>Name</b>         |         | <b>Primer sequence (5'-3')</b>                                   |
|---------------------|---------|------------------------------------------------------------------|
| <i>NSUN6</i> -shRNA |         | CCGGCGTCTGGCTAATAAGGACTCTCTCG<br>AGAGAGTCCTTATTAGCCAGACGTTTTTTTG |
| <i>DNMT1</i>        | Forward | ATCGGATGAGTCCATCAAGG                                             |
|                     | Reverse | TGGGTGTTGGTTCTTTGGTT                                             |
| <i>NSUN2</i>        | Forward | GGTATCCTGAAGAACTTGCC                                             |
|                     | Reverse | ATCTTATGATGAGGCCGCA                                              |
| <i>NSUN3</i>        | Forward | TCCAAAGAACTCGGAGATGC                                             |
|                     | Reverse | TGGGTAAAGATCCCTGAGAGAG                                           |
| <i>NSUN5</i>        | Forward | GGAATGAGGACCTGTTGGAA                                             |
|                     | Reverse | AAGGGTCCAGGAGAAAATG                                              |
| <i>NSUN6</i>        | Forward | GAAAGGCATGGGCATAAGAA                                             |
|                     | Reverse | TGTGTGTTGTTTTCCCTCCA                                             |
| <i>NSUN7</i>        | Forward | TATGAGCTGGCTTTCAGTGC                                             |
|                     | Reverse | TGCTGCAGCCAATTTTATCTT                                            |
| <i>CDK10</i>        | Forward | CCTGAAGGTTTCCAACCTTGC                                            |
|                     | Reverse | GGTTCCCAACAGCAGTTCA                                              |
| <i>MKI67</i>        | Forward | CTGCTTGTTTGAAGGGGTA                                              |
|                     | Reverse | AGCCGTACAGGCTCATCAAT                                             |
| <i>GAPDH</i>        | Forward | TGCACCACCAACTGCTTAGC                                             |
|                     | Reverse | GGCATGGACTGTGGTCATGAG                                            |

## Supplementary Figures

**A**

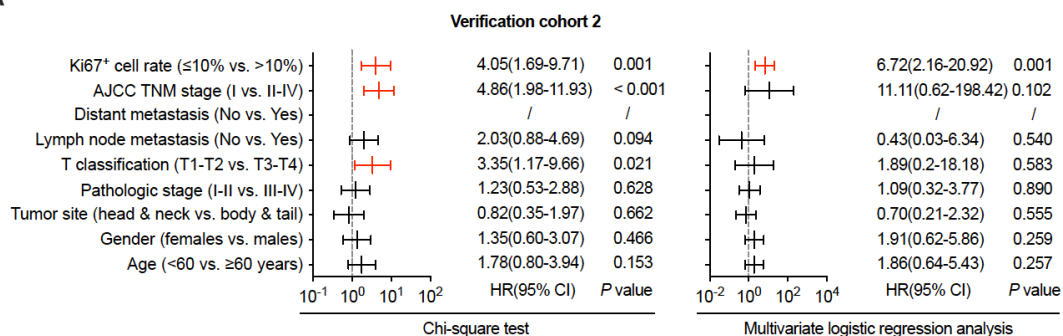

**B**

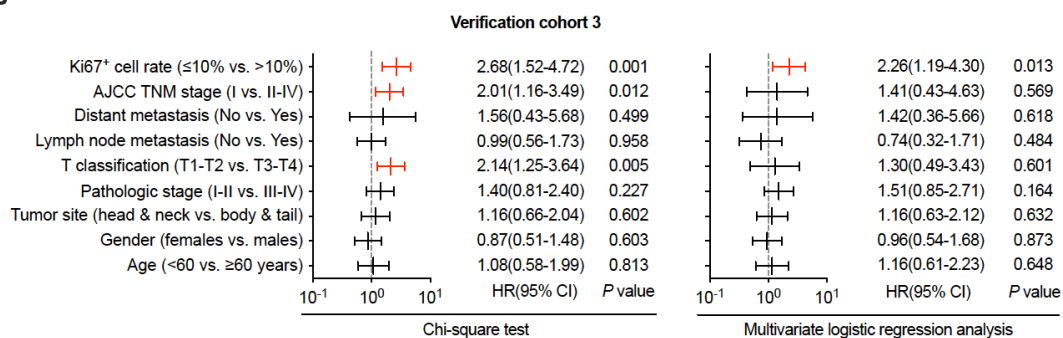

**Supplementary Figure 1.** Univariate and multivariate analysis were used to explore the association between the NSUN6 protein levels and the clinicopathologic features of PC patients from verification cohort 2 (A) and 3 (B). Red lines represent NSUN6 significantly related clinicopathologic features with  $P < 0.05$ .

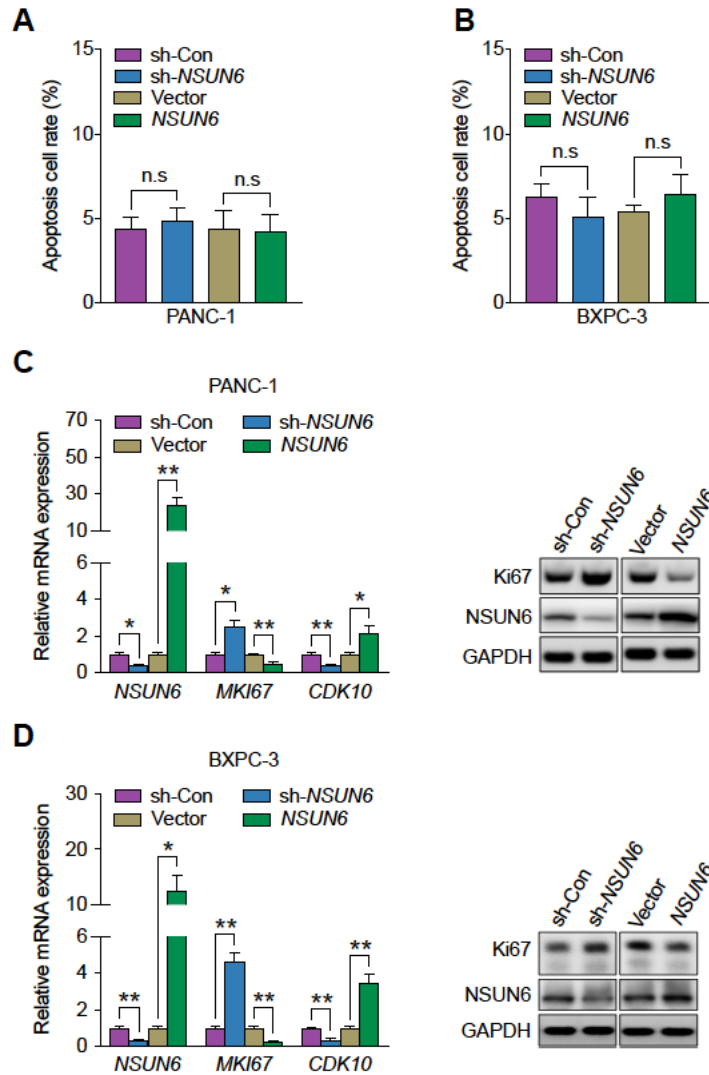

**Supplementary Figure 2.** Effects of NSUN6 on cell apoptosis and MKI67 expression. (A-B) Apoptosis rate analysis of PANC-1 and BXPC-3 cells transfected with *NSUN6* shRNA (sh-*NSUN6*), control shRNA (sh-Con), *NSUN6* overexpression vector (*NSUN6*), or control vector (Vector). (C-D) qPCR and western blot analysis of NSUN6, MKI67 and CDK10 expression in PANC-1 and BXPC-3 cells transfected with *NSUN6* shRNA (sh-*NSUN6*), control shRNA (sh-Con), *NSUN6* overexpression vector (*NSUN6*), or control vector (Vector). All experiment, n = 3; bar, S.E.M., \* $P < 0.05$ ; \*\*  $P < 0.01$ ; n.s, not significant; Student's t-test

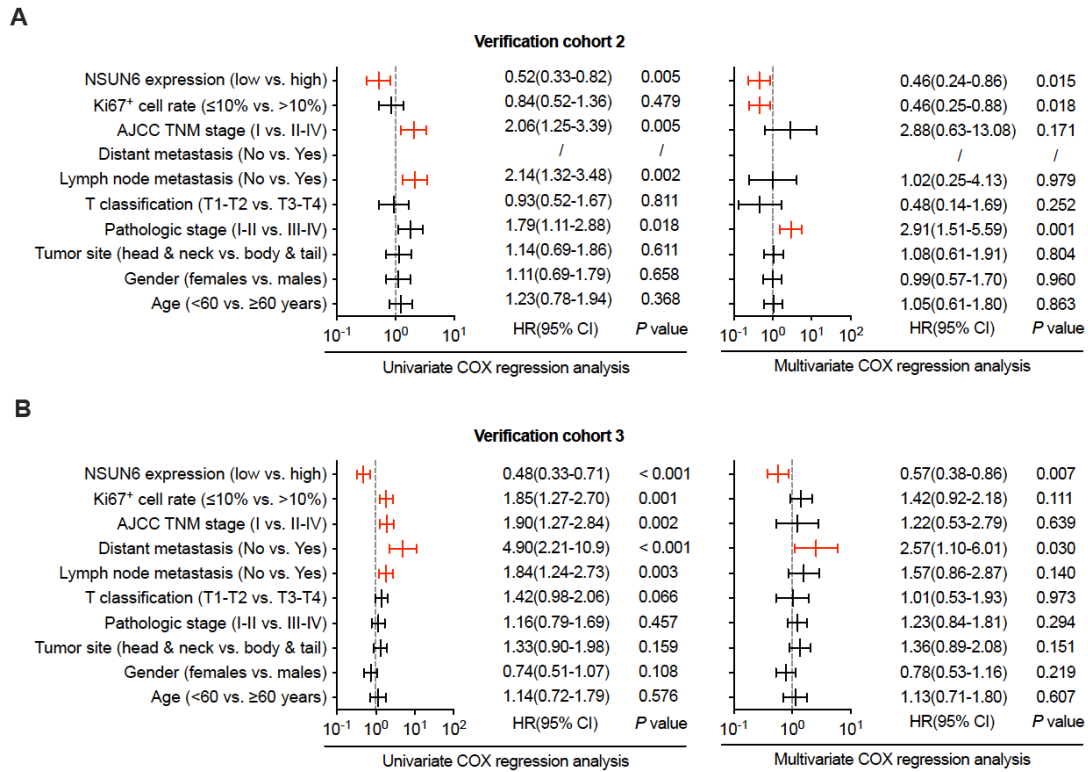

**Supplementary Figure 3.** Univariable and multivariable COX regression analysis of the associations between the prognostic parameters and OS among the PC patients in verification cohort 2 (A) and 3 (B). Red lines represent the factors significantly correlated with PC prognosis with  $P < 0.05$ .



**Figure 2f**

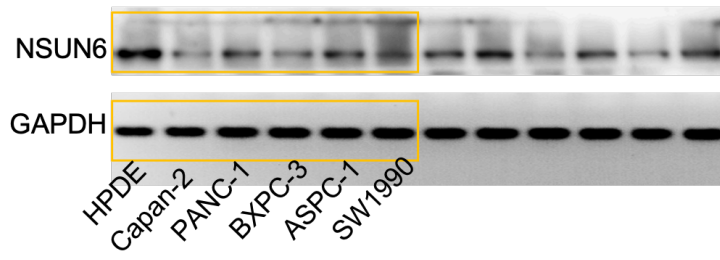

**Supplemental Figure 2c**

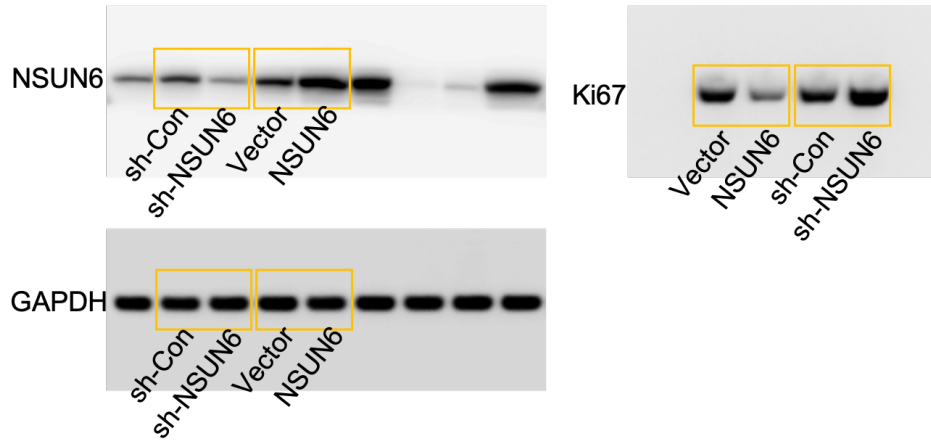

**Supplemental Figure 2d**

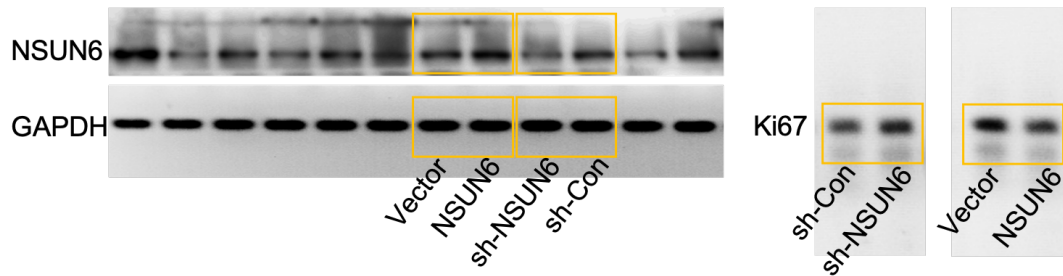

**Supplementary Figure 4.** Full blots of figures.
