# Supplementary material for: The RNA methyltransferase NSUN6 suppresses pancreatic cancer development by regulating cell proliferation
Source: PubMed Central journal article supplement — eBioMedicine. 2021 Jan 6;63:103195. doi: 10.1016/j.ebiom.2020.103195 (PMC7804980; doi:10.1016/j.ebiom.2020.103195), 2021-01-06
Supplement: mmc2.pdf [file mmc2.pdf]

## The ARRIVE Essential 10

These items are the basic minimum to include in a manuscript. Without this information, readers and reviewers cannot assess the reliability of the findings.

| Item                                    | Recommendation                                                                                                                                                                                                                                                                                                                                                                                                                                                                                                                                                                                 | Section/line number, or reason for not reporting                                                                                                                                                                                                                                                                                                                                                                                                                                                                                                                                                                                                   |
|-----------------------------------------|------------------------------------------------------------------------------------------------------------------------------------------------------------------------------------------------------------------------------------------------------------------------------------------------------------------------------------------------------------------------------------------------------------------------------------------------------------------------------------------------------------------------------------------------------------------------------------------------|----------------------------------------------------------------------------------------------------------------------------------------------------------------------------------------------------------------------------------------------------------------------------------------------------------------------------------------------------------------------------------------------------------------------------------------------------------------------------------------------------------------------------------------------------------------------------------------------------------------------------------------------------|
| <b>Study design</b>                     | 1 For each experiment, provide brief details of study design including: <ol style="list-style-type: none"> <li>The groups being compared, including control groups. If no control group has been used, the rationale should be stated.</li> <li>The experimental unit (e.g. a single animal, litter, or cage of animals).</li> </ol>                                                                                                                                                                                                                                                           | Study design is detailed in Method section. For each experiment, all the groups being compared include control groups. The experimental unit include gene/protein expression, number, weight and survival time                                                                                                                                                                                                                                                                                                                                                                                                                                     |
| <b>Sample size</b>                      | 2 <ol style="list-style-type: none"> <li>Specify the exact number of experimental units allocated to each group, and the total number in each experiment. Also indicate the total number of animals used.</li> <li>Explain how the sample size was decided. Provide details of any <i>a priori</i> sample size calculation, if done.</li> </ol>                                                                                                                                                                                                                                                | Sample size is detailed in Statistical analysis of Method section and Figure legend (Cell experiment: n = 3, Animal experiment: n = 5, Human pancreatic tissue sample: n = 744 ). In general, no statistical methods were used to pre-determine sample size. For the animal experiments, sample size was determined based on previous experience with xenograft models of pancreatic cancer and literature reports. For human samples, samples were collected <i>ad-hoc</i> for the sample size was sufficient to give reliable estimates. For cell and biochemical data, we aimed to collect data from three biological replicates when possible. |
| <b>Inclusion and exclusion criteria</b> | 3 <ol style="list-style-type: none"> <li>Describe any criteria used for including and excluding animals (or experimental units) during the experiment, and data points during the analysis. Specify if these criteria were established <i>a priori</i>. If no criteria were set, state this explicitly.</li> <li>For each experimental group, report any animals, experimental units or data points not included in the analysis and explain why. If there were no exclusions, state so.</li> <li>For each analysis, report the exact value of <i>n</i> in each experimental group.</li> </ol> | Inclusion and exclusion criteria of the animals during the experiment is detailed in Xenograft model of Method section. No data were excluded from analysis. The exact value of <i>n</i> is provided in Figure legend.                                                                                                                                                                                                                                                                                                                                                                                                                             |
| <b>Randomisation</b>                    | 4 <ol style="list-style-type: none"> <li>State whether randomisation was used to allocate experimental units to control and treatment groups. If done, provide the method used to generate the randomisation sequence.</li> <li>Describe the strategy used to minimise potential confounders such as the order of treatments and measurements, or animal/cage location. If confounders were not controlled, state this explicitly.</li> </ol>                                                                                                                                                  | No randomization was done during group allocation. Animals of similar age and sex (littermates where possible) were used to control for covariates.                                                                                                                                                                                                                                                                                                                                                                                                                                                                                                |
| <b>Blinding</b>                         | 5 Describe who was aware of the group allocation at the different stages of the experiment (during the allocation, the conduct of the experiment, the outcome assessment, and the data analysis).                                                                                                                                                                                                                                                                                                                                                                                              | Blinding criteria of IHC scoring is detailed in Tissue microarrays IHC staining assays of Method section.                                                                                                                                                                                                                                                                                                                                                                                                                                                                                                                                          |
| <b>Outcome measures</b>                 | 6 <ol style="list-style-type: none"> <li>Clearly define all outcome measures assessed (e.g. cell death, molecular markers, or behavioural changes).</li> <li>For hypothesis-testing studies, specify the primary outcome measure, i.e. the outcome measure that was used to determine the sample size.</li> </ol>                                                                                                                                                                                                                                                                              | Outcome measures definition criteria is detailed in Method section. Hypothesis-testing studies was not used in this study.                                                                                                                                                                                                                                                                                                                                                                                                                                                                                                                         |
| <b>Statistical methods</b>              | 7 <ol style="list-style-type: none"> <li>Provide details of the statistical methods used for each analysis, including software used.</li> <li>Describe any methods used to assess whether the data met the assumptions of the statistical approach, and what was done if the assumptions were not met.</li> </ol>                                                                                                                                                                                                                                                                              | Statistical methods are detailed in Statistical analysis of Method section.                                                                                                                                                                                                                                                                                                                                                                                                                                                                                                                                                                        |
| <b>Experimental animals</b>             | 8 <ol style="list-style-type: none"> <li>Provide species-appropriate details of the animals used, including species, strain and substrain, sex, age or developmental stage, and, if relevant, weight.</li> <li>Provide further relevant information on the provenance of animals, health/immune status, genetic modification status, genotype, and any previous procedures.</li> </ol>                                                                                                                                                                                                         | Experimental animals information are detailed in Xenograft model of Method section.                                                                                                                                                                                                                                                                                                                                                                                                                                                                                                                                                                |
| <b>Experimental procedures</b>          | 9 For each experimental group, including controls, describe the procedures in enough detail to allow others to replicate them, including: <ol style="list-style-type: none"> <li>What was done, how it was done and what was used.</li> <li>When and how often.</li> <li>Where (including detail of any acclimatisation periods).</li> <li>Why (provide rationale for procedures).</li> </ol>                                                                                                                                                                                                  | Experimental procedures are detailed in the Method section.                                                                                                                                                                                                                                                                                                                                                                                                                                                                                                                                                                                        |
| <b>Results</b>                          | 10 For each experiment conducted, including independent replications, report: <ol style="list-style-type: none"> <li>Summary/descriptive statistics for each experimental group, with a measure of variability where applicable (e.g. mean and SD, or median and range).</li> <li>If applicable, the effect size with a confidence interval.</li> </ol>                                                                                                                                                                                                                                        | For each experiment conducted, including independent replications, descriptive statistics (mean and SEM, median and range), confidence interval are detailed in the Results section, Figure legend, and Supplemental Tables.                                                                                                                                                                                                                                                                                                                                                                                                                       |
